# Supplementary material for: Charge compensations of Eu2+ and Oi2− co-exist in Eu3+:CaMoO4 single-crystal fibers grown by the micro-pulling-down method
Source: Royal Society of Chemistry journal article supplement (doi:10.1039/c8ce01160e), 2018-01-01
Supplement: c8ce01160e1.pdf [file c8ce01160e1.pdf]

Supporting Information for:

## “Charge compensations of $\text{Eu}^{2+}$ and $\text{O}_i^{2-}$ co-exist in $\text{Eu}^{3+}$ : $\text{CaMoO}_4$

### single-crystal fibers grown by micro-pulling-down method”

Jun Shu,<sup>1,2</sup> Zhitai Jia,<sup>1</sup> Eugenio Damiano,<sup>2,3</sup> Haoyuan Wang,<sup>1</sup> Yanru Yin,<sup>1</sup> Na Lin,<sup>1</sup> Xian Zhao,<sup>1</sup> Xinguang Xu,<sup>1</sup> Mauro Tonelli,<sup>2,4\*</sup> and Xutang Tao<sup>1\*</sup>

1. State Key Laboratory of Crystal Materials, Shandong University, Jinan 250100, China
2. Dipartimento di Fisica, Università di Pisa, Largo B. Pontecorvo 3, 56127 Pisa, Italy
3. Dipartimento di Scienze Fisiche, della Terra e dell’Ambiente—Sezione di Fisica, Università di Siena, Via Roma 56, 53100 Siena, Italy
4. NEST, Istituto Nanoscienze—CNR, Piazza S. Silvestro 12, 56127 Pisa, Italy

Corresponding Author

\* E-mail: [mauro.tonelli@unipi.it](mailto:mauro.tonelli@unipi.it) ; [txt@sdu.edu.cn](mailto:txt@sdu.edu.cn).

#### Experimental Details:

##### Crystal quality

Figure S1 shows 1 at.%  $\text{Eu}^{3+}$  (a) and 1at.%  $\text{Eu}^{3+}$ – 1at.%  $\text{Li}^+$  (b) doped  $\text{CaMoO}_4$  SCFs with internal cracks. The 1%  $\text{Eu}^{3+}$ – 1%  $\text{Li}^+$  SCF had less cracks than the 1%  $\text{Eu}^{3+}$  SCF. Figure S2 shows the good quality of 0.01 at.%  $\text{Eu}^{3+}$ : $\text{CaMoO}_4$  SCF tested by the X-ray Laue diffractometer.

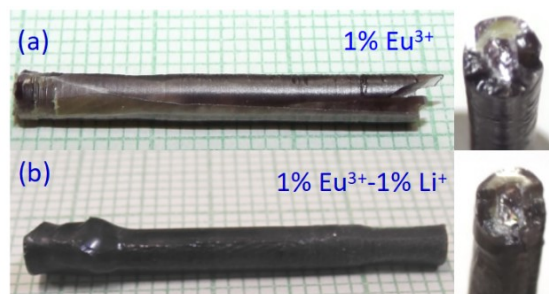

Figure S1: Two SCFs of  $\text{CaMoO}_4$  : 1%  $\text{Eu}^{3+}$  (a) and 1%  $\text{Eu}^{3+}$ -1%  $\text{Li}^+$  (b) grown with a Pt wire in air atmosphere.

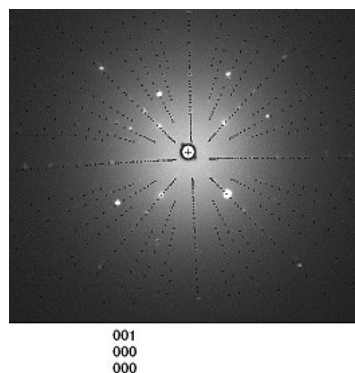

Figure S2: The good quality of 0.01 at.%  $\text{Eu}^{3+}$ : $\text{CaMoO}_4$  SCF tested by the X-ray Laue diffractometer.

## Characterizations.

X-ray powder diffraction patterns were checked with a Bruker-AXS D8 ADVANCE X-ray diffractometer using Cu-K $\alpha$  ( $\lambda = 1.5418 \text{ \AA}$ ) radiation.

Absorption. Polarized absorption spectra in the range of 200-800 nm were performed using a Varian Cary 5000 spectrophotometer. The resolution was 1.5 nm. Low temperature (10 K, 77 K) measurements were done with a closed cycle He cryostat.

Fluorescence. The fluorescence spectra were measured by exciting samples with a 395 nm LED or 532 nm solid state laser, focused by a 10 cm lens. The emission was chopped and focused on a monochromator equipped with a grating with 1200 g/mm, and synchronously detected by a Hamamatsu R943-02 photomultiplier. All spectra were corrected with the response of our detection system to a black-body lamp at 3000 K.

X-ray Photoelectron Spectroscopy (XPS). XPS measurements were carried out on ESCALAB 250 XPS instrument (produced by ThermoFisher Scientific Ltd.) using Al K $\alpha$  X-ray sources. The energies were calibrated with the peak of C 1s at 284.6 eV. The tests were centered on the polished surfaces.

Annealing. Two samples were cut from 0.01% Eu<sup>3+</sup>: CaMoO<sub>4</sub> single crystal fiber. Before and after annealing, samples were polished and signed their thickness at two cut surfaces. Absorption measurements were centered on surfaces. Sample A was annealed at 1226°C for 24 h in air atmosphere. Sample B was annealed at 1000°C for 5 h in H<sub>2</sub> atmosphere (H<sub>2</sub>:N<sub>2</sub>=5:95). The absorption spectra were carried out by U-4100 spectrophotometer in the range of 350-800 nm. The resolution was 1.5 nm.

## Calculated band gap

Figure S3 shows the band structure of pure CaMoO<sub>4</sub> and the (Eu<sup>2+</sup>-O<sub>i</sub><sup>2-</sup>):CaMoO<sub>4</sub>. The Fermi level is located in the zero energy. The band gap of pure CaMoO<sub>4</sub> and the (Eu<sup>2+</sup>-O<sub>i</sub><sup>2-</sup>):CaMoO<sub>4</sub> are 3.1 eV and 1.5 eV, respectively.

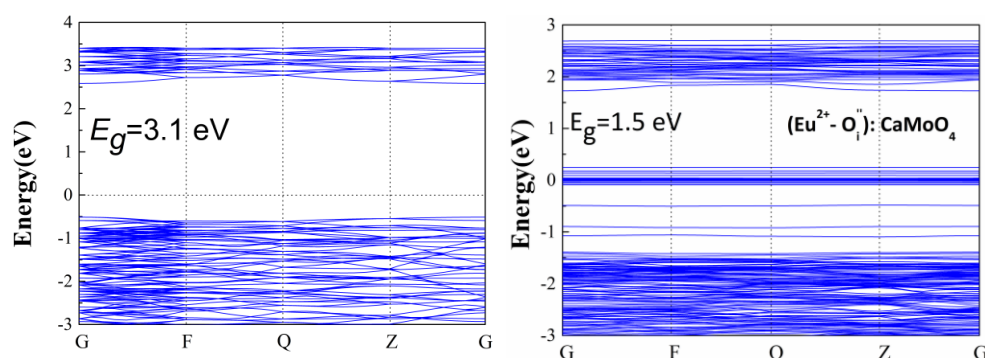

Figure S3: The Band structure of pure CaMoO<sub>4</sub> and the (Eu<sup>2+</sup>-O<sub>i</sub><sup>2-</sup>):CaMoO<sub>4</sub>.

## Raman spectrum

We have measured the Raman spectrum of the Eu<sup>3+</sup>: CaMoO<sub>4</sub> SCF sample as shown in Figure S4. The wavelength range has been extended to 2000 cm<sup>-1</sup>[1]. The maximum Raman shift of it is 879.3 cm<sup>-1</sup>. The result is consistent with what others have reported about pure CaMoO<sub>4</sub>. [2]

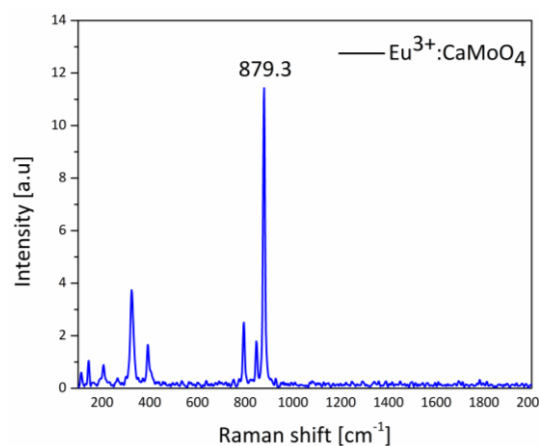

Figure S4: The Raman spectrum of the  $\text{Eu}^{3+}:\text{CaMoO}_4$  SCF sample

#### XPS of Mo3d

Mo keeps the +6 valence state before and after annealing process as shown in Figure S5 and Figure S6. The Mo3d spectra composed of two peaks at 231.9 eV and 235.1 eV are ascribed to  $\text{Mo3d}_{5/2}$  and  $\text{Mo3d}_{3/2}$  of  $\text{Mo}^{6+}$ .<sup>45-47</sup>

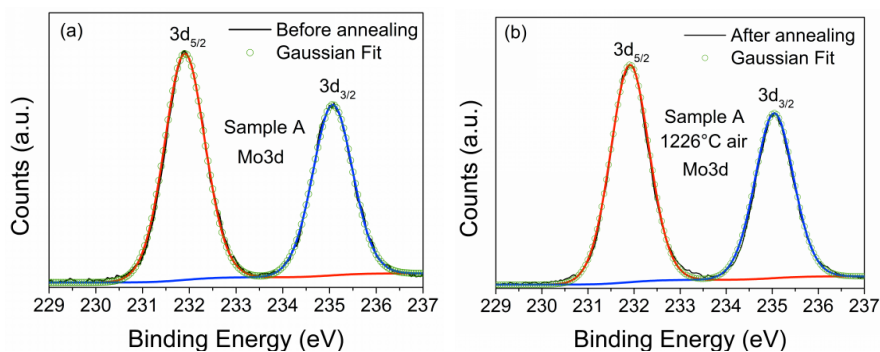

Figure S5: The Mo3d XPS of sample A before (a) and after (b) annealing in air atmosphere.

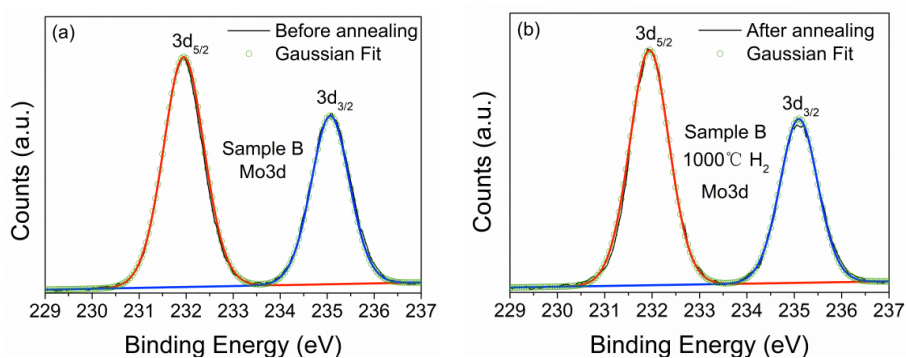

Figure S6: The Mo3d XPS of sample B before (a) and after (b) annealing in  $\text{H}_2$  atmosphere.

#### References:

- [1]. Hanuza, J. and V.V. Fomitsev, Journal of Molecular Structure, 1980. 66(SEP): p. 1-24.
- [2]. Basiev, T.T., et al., Optical Materials, 1999. 11(4): p. 307-314.
